# Left Atrial and Right Atrial Deformation in Patients with Coronary Artery Disease: A Velocity Vector Imaging-Based Study

Ping Yan<sup>1</sup>, Bin Sun<sup>1</sup>, Haiming Shi, Wen Zhu, Qing Zhou, Yuwen Jiang, Hui Zhu, Guoqian Huang\*

Department of Cardiology, Huashan Hospital, Fudan University, Shanghai, PR China

## Abstract

**Background:** Impaired left ventricular (LV) function has been shown by strain rate (SR) imaging in patients with coronary artery disease (CAD). Our aim was to investigate global and regional, systolic and diastolic left atrial (LA) and right atrial (RA) longitudinal deformation in CAD using velocity vector imaging.

**Methods:** Echocardiographic and velocity vector imaging studies were performed in 20 patients with mild CAD, 40 patients with severe CAD and 25 controls. Maximal atrial volume, peak atrial longitudinal strain ( $\epsilon_s$ ) and SR during LV systole (SRs), SR during early LV filling (SRe) and late LV filling (SRa) were measured. Longitudinal strain during atrial contraction ( $\epsilon_a$ ) was obtained at the onset of P-wave on electrocardiography, and  $\epsilon_a/\epsilon_s$  was calculated.

**Results:** Longitudinal peak  $\epsilon_s$  and SRs of LA showed decreased trend among CAD patients. The global and lateral LA SRe were prominently lower, while RA  $\epsilon_a$ , SRa and  $\epsilon_a/\epsilon_s$  were prominently higher in 2 CAD groups than control group ( $P$  value  $<0.05$ ). As compared with controls and patients with other single-vessel disease, LA SRa and  $\epsilon_a/\epsilon_s$  ratio were significantly increased among patients with exclusively left anterior descending coronary artery (LAD) stenosis (SRa  $1.14 \pm 0.38 \text{ s}^{-1}$ ,  $1.10 \pm 0.41 \text{ s}^{-1}$ ,  $1.45 \pm 0.46 \text{ s}^{-1}$ ,  $P$  value  $<0.05$ ;  $\epsilon_a/\epsilon_s$   $0.44 \pm 0.11$ ,  $0.44 \pm 0.20$ ,  $0.57 \pm 0.12$ ,  $P$  value  $<0.01$ ).

**Conclusions:** Apparently decreased SRe of LA and increased  $\epsilon_a$ , SRa and  $\epsilon_a/\epsilon_s$  of RA were found in CAD patients with preserved LVEF and E/E' in gray zone. SRa and  $\epsilon_a/\epsilon_s$  of LA were found to significantly increase in those with LAD stenosis.

**Citation:** Yan P, Sun B, Shi H, Zhu W, Zhou Q, et al. (2012) Left Atrial and Right Atrial Deformation in Patients with Coronary Artery Disease: A Velocity Vector Imaging-Based Study. PLoS ONE 7(12): e51204. doi:10.1371/journal.pone.0051204

**Editor:** Michael Lipinski, University of Virginia Health System, United States of America

**Received:** August 15, 2012; **Accepted:** October 30, 2012; **Published:** December 4, 2012

**Copyright:** © 2012 Yan et al. This is an open-access article distributed under the terms of the Creative Commons Attribution License, which permits unrestricted use, distribution, and reproduction in any medium, provided the original author and source are credited.

**Funding:** The authors have no support or funding to report.

**Competing Interests:** The authors have declared that no competing interests exist.

\* E-mail: guoqian\_huang@yahoo.com.cn

† These authors contributed equally to this work.

## Introduction

Coronary artery disease (CAD) is a major public health problem with high risk of developing heart failure. Left ventricular (LV) diastolic dysfunction is often present in patients with significant CAD, even preceding regional or global LV systolic dysfunction, which therefore might serve as an early and sensitive marker of ischemia [1,2]. Furthermore, it is well known that the atrial contribution is of particular importance in the setting of LV dysfunction to maintain adequate LV stroke volume [3]. Evaluation of LA function may emerge as an important component in assessing the hemodynamic effects of many diseases.

In recent years, accumulative evidence has shown that strain ( $\epsilon$ ) and strain rate (SR) are powerful echocardiographic parameters to directly reflect global and regional systolic and diastolic myocardial deformation [4–8], and to sensitively detect dysfunction from myocardial ischemia in CAD patients [9–12]. The measurement of atrial deformation by strain method is a promising and useful tool, but there are few data on the ischemia-related alterations of atrial myocardial deformation. The aim of this study is to evaluate the function of both atrial myocardium in CAD patient using

vector velocity imaging (VVI), and also to test our novel hypothesis that atrial impairment might be associated with the severity of coronary stenosis and the distribution pattern of obstructive coronary artery.

## Methods

### Study Participants

Patients with suspected CAD and undergone coronary angiography in Huashan Hospital between May 2009 and January 2010 were continuously enrolled. To minimize the influence of some serious or complex medical conditions, we excluded patients with acute myocardial infarction or history of coronary revascularization (including coronary artery bypass grafting and percutaneous coronary intervention), diabetes mellitus, New York Heart Association (NYHA) class III–IV heart failure, abnormal cardiac rhythm (other than sinus rhythm). Also excluded were those with suboptimal angiographical or echocardiographic images. As a result, 85 participants were included in the final analysis. The study was approved by the medical ethics review committee of the Huashan Hospital and all subjects gave written informed consent.

Demographic data and cardiovascular risk factors were collected, including age, gender, weight, height, systolic blood pressure (SBP), diastolic blood pressure (DBP), and the history of hypertension, status of smoking. Body mass index (BMI) was calculated as weight in kg divided by height in meters squared [13]. Blood samples were collected after 12-hour overnight fasting. All samples were analyzed for serum total cholesterol, high-density lipoprotein cholesterol (HDL-C), low-density lipoprotein cholesterol (LDL-C), triglycerides, and blood glucose by enzymatic methods with an automatic analyzer (Hitachi 7600-020 Automated Analyzer; Hitachi, Tokyo, Japan). Results of a 75 g oral glucose tolerance test (OGTT) were recorded as well. Day-to-day coefficients of variation for all analyses were 1% to 2% at the central laboratory in our hospital.

Standard selective coronary angiography was performed using the Judkins technique, by a qualified catheterizing cardiologist and an angiographer who were blinded to the study. CAD was defined as  $\geq 50\%$  lumen narrowing of at least one major coronary vessel [14,15]. And the percentage of stenosis in each main branch was documented. Accordingly, the participants were classified into the following three categories: 1) control group without CAD; 2) mild CAD group with borderline (50–70%) coronary stenosis; and 3) severe CAD group with coronary stenosis greater than 70%.

### Echocardiography

Transthoracic echocardiography was performed on the subjects at rest in the left lateral decubitus position by 2 professional cardiologists with a Siemens Sequoia 512 ultrasound machine using a 3V2C transthoracic transducer (Siemens Medical Systems, Mountain View, CA, USA), 1–2 days before the angiographic studies. Complete two-dimensional, color, pulsed and continuous-wave doppler examinations were performed according to standard techniques [16,17]. Parasternal long-axis views were used to derive the M-Mode measurements of LA size, LV end-diastolic interventricular septal (IVST) and posterior wall thickness (PWT), and LV end-diastolic (LVDd) and end-systolic dimensions (LVDs). LV mass (LVM) was calculated using the regression equation described by Devereux et al [18], i.e.  $LVM = 1.04 \times (IVST + PWT + LVDd)^3 - LVDd^3 - 13.6$ , and was corrected to body surface area [19]. LV fractional shortening (LVFS) was calculated as  $(LVDd - LVDs)/LVDd$ . LV ejection fraction (LVEF) was calculated by the modified biplane Simpson rule and expressed as a percentage. From the LV inflow spectrum (measured at the tips of the mitral valve), the transmitral peak E-wave velocity, E wave deceleration time and peak A-wave velocity were recorded during quiet breathing. The ratio of maximal mitral flow velocities (E/A ratio) was calculated. In addition, the septal mitral annulus early (E') velocity was measured by tissue doppler imaging, and the E/E' ratio was calculated using a cutoff value  $>15$  to represent elevated LV filling pressure [20]. All echocardiographic measurements used in the analysis were averaged from 3 heart beats [5].

### VVI Analysis

For the assessment of longitudinal atrial deformation, two-dimensional grey-scale image of apical 4-chamber view was obtained under VVI mode with highest possible frame rate and a stable electrocardiogram recording. Special attention was paid to avoid foreshortening the atrium and to gain a reliable delineation of the atrial endocardial border. Cine loops with 2–3 consecutive heart cycles during breath hold were acquired and saved digitally.

Strain analysis of LA and RA was performed offline with Siemens syngo US workplace (version 2, Siemens Medical Solutions USA). After manually defining the endocardial border

of both atriums, the myocardial speckle was automatically tracked frame-by-frame by the VVI software throughout the cardiac cycle to calculate and generate strain/strain rate curves. Besides LA and RA global longitudinal function, regional atrial longitudinal strain/strain rates of the interatrial septum and lateral wall were also evaluated respectively. As shown in Figure 1, peak atrial longitudinal strain ( $\epsilon_s$ ) and peak strain rate (SRs) were measured at LV systolic phase, while peak atrial longitudinal SRe during early LV filling and SRa during late LV diastolic phase were measured. Longitudinal strain during atrial contraction ( $\epsilon_a$ ) was obtained at the onset of the P-wave on electrocardiography, and the  $\epsilon_a/\epsilon_s$  ratio was calculated (corresponding to the contribution of atrial active contraction to the whole atrial deformation during a cardiac cycle). Additionally, atrial time-volume curve and  $dV/dt$  curve were rendered automatically by VVI software. Maximal atrial volume and peak atrial  $dV/dt$  at ventricular systole were determined.

Interobserver and intraobserver variability for atrial strain/strain rate were examined in an analysis of 20 randomly selected patients. Measurements were performed by one observer, and then repeated two separate times by two observers who were unaware of the other's measurements. More than 4 weeks elapsed between the two readings by the same observer with blinding to the initial measurements.

### Statistical Analysis

Statistical analysis was performed using SPSS 15.0 statistical software (SPSS Inc., Chicago, Ill., USA). Continuous data were expressed as means  $\pm$  SD, and categories data as percentages. Continuous variables were compared using Student's t-test, or ANOVA when appropriate. Furthermore, Pearson's and Spearman's (for nonnormally distributed data) coefficients of correlation were used where appropriate. All of the reported P values were two-sided with statistical significance evaluated at 0.05.

## Results

### Clinical Characteristics

The clinical data of the 85 participants are presented in Table 1. There was no difference in age, gender distribution, blood pressure, blood glucose/NT-proBNP levels, or kidney function among the 3 groups. None was found to have plasma NT-proBNP  $>200$  pg/ml. Blood lipid levels between groups were also similar, except that triglycerides in patients with severe CAD were higher. The proportions of hypertensive subjects were 15% in mild CAD group, 22% in severe CAD group, and 20% in control group (P value, 0.66). There was no difference in history of medical therapy between the 3 groups.

Of the 60 CAD patients, 17 had exclusively left anterior descending coronary artery (LAD) stenosis, and 10 had exclusively left circumflex coronary artery (LCX) or right coronary artery (RCA) stenosis. 33 had multiple-vessel disease. Of all the patients, 33 were successfully treated by percutaneous coronary intervention with stent implant, while 7 patients needed subsequent coronary arterial bypass grafting surgery.

### Echocardiographic Features

Conventional transthoracic echocardiographic parameters of the study population are presented in Table 2. All the subjects had normal LV diastolic and systolic dimensions. 2 patients with severe CAD were found with mild decreased LV systolic function (LVEF 45–50%). However, there was no significant difference in LVEF or LVFS between 3 groups. The LA dimensions in control, mild CAD and severe CAD groups were  $36.36 \pm 4.07$  mm,

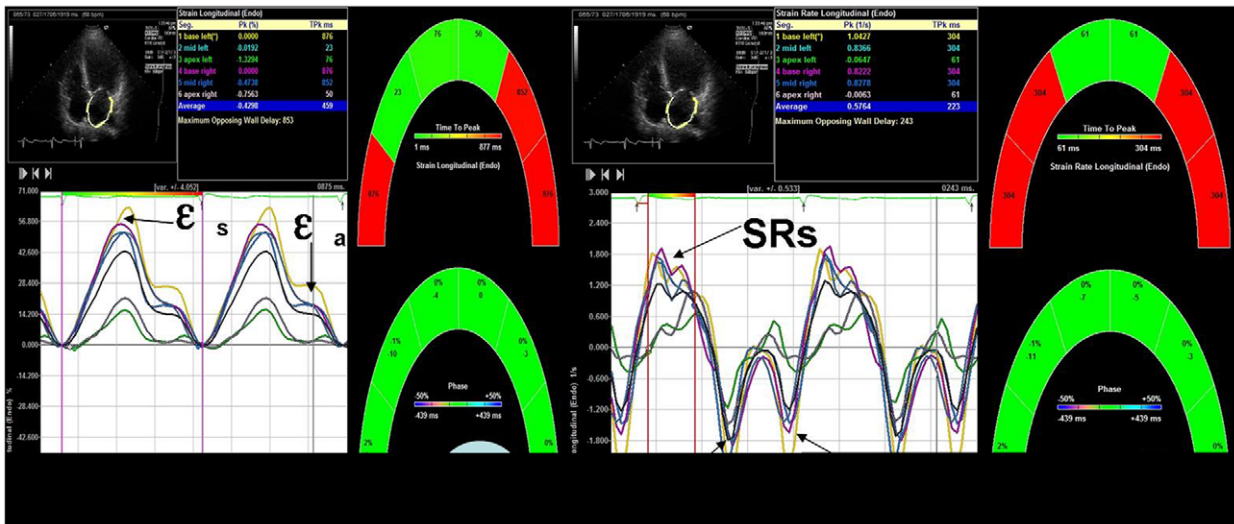

**Figure 1. Left atrial longitudinal strain/strain rate curves obtained from an apical four-chamber view.**  $\epsilon_s$ : peak atrial longitudinal strain during ventricular systole,  $\epsilon_a$ : atrial strain at the onset of P-wave on electrocardiography, SRs: peak left atrial strain during LV systole, SRa: peak left atrial strain during early LV diastole.  
doi:10.1371/journal.pone.0051204.g001

**Table 1. Baseline clinical data.**

| Variable                                            | control group<br>(n = 25) | mild CAD group<br>(n = 20) | severe CAD group<br>(n = 40) | P Value |
|-----------------------------------------------------|---------------------------|----------------------------|------------------------------|---------|
| Age (y)                                             | 60.56 ± 8.89              | 67.60 ± 8.57               | 62.03 ± 12.39                | 0.07    |
| Male gender                                         | 17 (68%)                  | 14 (70%)                   | 25 (62.5%)                   | 0.82    |
| BMI (kg/m <sup>2</sup> )                            | 23.54 ± 7.05              | 25.39 ± 4.96               | 23.29 ± 4.45                 | 0.58    |
| Heart rate (min <sup>-1</sup> )                     | 73.45 ± 8.32              | 72.25 ± 15.07              | 69.56 ± 9.89                 | 0.16    |
| SBP (mmHg)                                          | 126.23 ± 14.2             | 125.52 ± 17.62             | 133.37 ± 18.05               | 0.22    |
| DBP (mmHg)                                          | 77.44 ± 10.23             | 73.66 ± 10.52              | 78.13 ± 9.24                 | 0.33    |
| eGFR <sup>&amp;</sup> (ml/min/1.73 m <sup>2</sup> ) | 82.70 ± 16.67             | 83.89 ± 15.08              | 77.03 ± 22.59                | 0.82    |
| FPG (mmol/L)                                        | 5.79 ± 1.33               | 4.97 ± 0.82                | 6.72 ± 2.45                  | 0.57    |
| 2-h oral glucose (mmol/L)                           | 8.10 ± 3.17               | 6.83 ± 2.96                | 7.74 ± 3.19                  | 0.63    |
| HbA1c (%)                                           | 6.32 ± 0.90               | 5.48 ± 1.09                | 5.65 ± 1.89                  | 0.29    |
| Cholesterol (mmol/L)                                | 4.31 ± 0.94               | 4.14 ± 1.1941              | 5.03 ± 1.41                  | 0.10    |
| Triglyceride (mmol/L)                               | 2.09 ± 1.05               | 2.51 ± 1.52                | 3.17 ± 2.22 <sup>*</sup>     | 0.04    |
| LDL-C (mmol/L)                                      | 2.62 ± 0.91               | 2.45 ± 0.81                | 2.90 ± 1.34                  | 0.56    |
| HDL-C (mmol/L)                                      | 1.01 ± 0.24               | 1.17 ± 0.36                | 0.99 ± 0.27                  | 0.31    |
| NT-proBNP (pg/ml)                                   | 86.01 ± 23.21             | 97.23 ± 27.26              | 115.07 ± 36.34               | 0.56    |
| hs-CRP(mg/L)                                        | 2.19 ± 2.97               | 2.36 ± 3.23                | 2.32 ± 2.99                  | 0.98    |
| Current Smoking                                     | 7 (28%)                   | 5 (25%)                    | 15 (37.5%)                   | 0.12    |
| HT                                                  | 5 (20%)                   | 3 (15%)                    | 10 (22.2%)                   | 0.66    |
| Medications                                         |                           |                            |                              |         |
| ACEI and/or ARB                                     | 14 (56%)                  | 8 (40%)                    | 20 (50%)                     | 0.56    |
| Beta-blocker                                        | 7 (28%)                   | 8 (40%)                    | 13 (32.5%)                   | 0.69    |
| CCB                                                 | 5 (20%)                   | 4 (20%)                    | 13 (32.5%)                   | 0.42    |

Abbreviations: BMI, body mass index; SBP, systolic blood pressure; DBP, diastolic blood pressure; FPG, fasting plasma glucose; HbA1c, glycated hemoglobin A1c; LDL-C, low-density lipoprotein cholesterol; HDL-C, high density lipoprotein cholesterol; NT-proBNP, N-terminal pro-brain natriuretic peptide; hs-CRP, high sensitivity C-reactive protein; HT, hypertension; ACEI, angiotensin-converting enzyme inhibitor; ARB, angiotensin II receptor blocker; CCB, calcium channel blocker.

<sup>\*</sup>p < 0.05 versus control group.

<sup>&</sup>Abbreviated MDRD equation: estimated glomerular filtration rate (eGFR), in mL/min per 1.73 m<sup>2</sup> = 186.3 × SCr (exp [-1.154]) × Age (exp [-0.203]) × (0.742 if female) × (1.21 if black).

doi:10.1371/journal.pone.0051204.t001

**Table 2.** Echocardiographic parameters in patients and controls.

| Variables                  | control group<br>(n = 25) | mild CAD group<br>(n = 20) | severe CAD group<br>(n = 40) | P Value |
|----------------------------|---------------------------|----------------------------|------------------------------|---------|
| Ao (mm)                    | 33.32±3.59                | 32.50±3.69                 | 31.97±2.93                   | 0.29    |
| LA (mm)                    | 36.36±4.07                | 38.50±4.15                 | 36.68±4.74                   | 0.22    |
| LVDd (mm)                  | 48.72±3.77                | 49.05±5.61                 | 47.18±3.98                   | 0.20    |
| LVDs (mm)                  | 30.72±3.87                | 30.55±4.92                 | 29.33±3.12                   | 0.29    |
| IVST (mm)                  | 9.68±1.37                 | 10.05±1.93                 | 10.03±1.56                   | 0.65    |
| LVPWT (mm)                 | 9.20±1.00                 | 9.30±1.26                  | 9.40±1.53                    | 0.84    |
| SV (mL)                    | 85.72±17.52               | 90.46±29.41                | 79.88±21.99                  | 0.22    |
| CI (L/min/m <sup>2</sup> ) | 2.93±0.70                 | 3.24±1.10                  | 2.74±0.90                    | 0.13    |
| LVFS (%)                   | 37.03±5.08                | 37.85±4.60                 | 37.80±4.42                   | 0.78    |
| LVEF (%)                   | 66.38±6.34                | 65.30±11.16                | 66.61±6.39                   | 0.82    |
| E velocity (cm/s)          | 77.80±14.73               | 69.00±21.07                | 72.85±19.92                  | 0.29    |
| A velocity (cm/s)          | 78.76±19.23               | 81.00±18.73                | 81.15±17.20                  | 0.86    |
| DT (ms)                    | 236.75±35.64              | 213.72±46.32               | 200.21±51.26                 | 0.22    |
| E/A                        | 1.05±0.34                 | 0.88±0.31                  | 0.94±0.35                    | 0.24    |
| E/E'                       | 6.62±2.53                 | 8.24±2.17                  | 8.60±2.58                    | 0.21    |
| LVMI (g/m <sup>2</sup> )   | 93.12±25.81               | 100.57±35.86               | 97.89±27.30                  | 0.31    |

Abbreviations: Ao, aorta; LA, left atrium; LVDd, left ventricular end-diastolic dimension; LVDs, left ventricular end-systolic dimension; IVST, interventricular wall thickness; LVPWT, left ventricular posterior wall thickness; SV, stroke volume; CI, cardiac index; LVFS, left ventricular fractional shortening; LVEF, left ventricular ejection fraction; DT, E-wave deceleration time; LVMI, left ventricular mass index.

doi:10.1371/journal.pone.0051204.t002

38.50±4.15 mm, 36.68±4.74 mm, respectively (*P* Value, 0.22). Compared with control group, the 2 CAD groups had lower E/A ratio and higher E/E' ratio, but the differences didn't reach statistical significance. None were found to have E/E' ratio >15. Five (8.3%) patients with CAD were found with mild mitral regurgitation, whereas none had moderate to severe regurgitation.

### VVI Analysis

Data from VVI by the severity of coronary stenosis are summarised in Table 3. The VVI analysis was feasible among all subjects with acceptable echocardiographic images. The average values for the global maximal LA volume index in control, mild CAD and severe CAD groups were 30.41±11.73 mL/m<sup>2</sup>, 33.68±9.34 mL/m<sup>2</sup>, 31.41±11.21 mL/m<sup>2</sup> (*P* Value, 0.60). No differences in the LA and RA Peak dv/dt were observed. Longitudinal  $\epsilon_s$  and SRs of LA tended to be decreased among CAD patients, even though the differences didn't reach statistical significance. Compared with those in the control group, the 2 CAD groups had lower global and lateral SRe (*P* value <0.05), without significant further decrease with increasing severity of coronary stenosis. LA lateral SRa was increased in severe CAD group. By contrast, SRe of RA didn't differ across 3 groups, whereas RA global and lateral  $\epsilon_a$ , SRa and  $\epsilon_a/\epsilon_s$  ratio was apparently increased in mild and severe CAD groups.

The results of LA deformation analysis by the distribution pattern of involved coronary artery (left anterior descending coronary artery (LAD), left circumflex coronary artery (LCX), and right coronary artery (RCA)) are shown in Table 4. Among the patients with exclusively LAD stenosis and those with exclusively LCX or RCA stenosis, maximal LA volumes remained similar while longitudinal LA global SRe decreased appreciably as compared with the controls. However, SRa and  $\epsilon_a/\epsilon_s$  ratio of LA were significantly increased only in LAD stenosis group (*P*

value<0.05, 0.01, respectively). No similar patterns were found in global RA deformation properties (data not shown).

Interobserver variability for strain was 5±7%, and intraobserver variability was 1.6±0.6%. In addition, inter- and intraobserver variability for strain rate was 0.09±0.06 s<sup>-1</sup> and 0.07±0.05 s<sup>-1</sup>, respectively.

### Discussion

The atrium has an important role in optimizing overall cardiac function, acting as a reservoir, a conduit, and a booster pump for blood returning to the heart [21]. The changes in LA size and function are associated with cardiovascular disease and are risk factors for atrial fibrillation, stroke, and death [7,22]. We evaluated comprehensive atrial functions among CAD patients, and investigated the association between atrial deformation and the severity of CAD or the distribution pattern of involved coronary artery, by using VVI. Our study showed a high feasibility. CAD patients were found with decreased SRe of LA as well as increased  $\epsilon_a$ , SRa and  $\epsilon_a/\epsilon_s$  ratio of RA. Patients with exclusively LAD stenosis were found with significantly enhanced SRa and  $\epsilon_a/\epsilon_s$  ratio of LA, while patients with exclusively LCX/RCA stenosis were not.

LA function measured as volumetric parameters by real-time three-dimensional echocardiography is considered a robust marker of LV filling pressure and an indicator of LV diastolic function [23]. Recent studies have shown that LA myocardial deformation parameters might be reduced before the atrial volume was changed [24,25]. Furthermore, it is recommended to use several, rather than single doppler echocardiographic technique for the accurate assessment of cardiac diastolic function [26]. VVI is an emerging and promising angle-independent echocardiographic technique to measure strain by speckles tracking, which overcomes the limitations of tissue doppler imaging [27].

**Table 3.** Velocity vector imaging-based measurements of LA/RA according to the severity of coronary stenosis.

| Variable                                   | control group<br>(n = 25) | mild CAD group<br>(n = 20) | severe CAD group<br>(n = 40) | P Value Overall |
|--------------------------------------------|---------------------------|----------------------------|------------------------------|-----------------|
| <b>LA Global</b>                           |                           |                            |                              |                 |
| maximum volume, cm <sup>3</sup>            | 62.34±19.78               | 67.11±15.46                | 65.5±22.18                   | 0.71            |
| maximal LA volume index, mL/m <sup>2</sup> | 30.41±11.73               | 33.68±9.34                 | 31.41±11.21                  | 0.60            |
| Peak dv/dt, ml/s                           | 151.77±50.05              | 148.53±41.36               | 156.12±62.89                 | 0.87            |
| $\epsilon_{sr}$ , %                        | 32.39±10.31               | 28.67±9.71                 | 28.69±8.75                   | 0.31            |
| $\epsilon_{ar}$ , %                        | 17.94±9.99                | 13.48±4.45                 | 14.59±6.06                   | 0.08            |
| SRs,s <sup>-1</sup>                        | 1.29±0.38                 | 1.15±0.22                  | 1.16±0.29                    | 0.19            |
| SRe,s <sup>-1</sup>                        | -1.08±0.30                | -0.84±0.45*                | -0.93±0.34*                  | 0.03            |
| Sra,s <sup>-1</sup>                        | -1.14±0.38                | -1.07±0.36                 | -1.22±0.48                   | 0.43            |
| $\epsilon_a/\epsilon_s$ ratio              | 0.46±0.11                 | 0.51±0.15                  | 0.49±0.15                    | 0.43            |
| <b>LA lateral</b>                          |                           |                            |                              |                 |
| $\epsilon_{sr}$ , %                        | 33.94±10.36               | 31.58±9.24                 | 29.68±7.67                   | 0.18            |
| $\epsilon_{ar}$ , %                        | 15.27±5.92                | 15.23±5.08                 | 13.20±5.72                   | 0.25            |
| SRs,s <sup>-1</sup>                        | 1.54±0.50                 | 1.30±0.37                  | 1.33±0.44                    | 0.14            |
| SRe,s <sup>-1</sup>                        | -1.21±0.32                | -0.88±0.49**               | -1.01±0.32*                  | 0.01            |
| Sra,s <sup>-1</sup>                        | -1.07±0.41                | -1.17±0.35                 | -1.45±0.68**&                | 0.02            |
| $\epsilon_a/\epsilon_s$ ratio              | 0.45±0.09                 | 0.50±0.17                  | 0.44±0.16                    | 0.27            |
| <b>Septum</b>                              |                           |                            |                              |                 |
| $\epsilon_{sr}$ , %                        | 35.06±14.00               | 28.38±10.48                | 32.10±11.84                  | 0.17            |
| $\epsilon_{ar}$ , %                        | 16.38±7.49                | 14.25±6.38                 | 17.39±7.89                   | 0.31            |
| SRs,s <sup>-1</sup>                        | 1.23±0.44                 | 1.22±0.37                  | 1.22±0.48                    | 0.99            |
| SRe,s <sup>-1</sup>                        | -1.05±0.36                | -0.89±0.44                 | -0.88±0.33                   | 0.17            |
| Sra,s <sup>-1</sup>                        | -1.14±0.38                | -1.14±0.44                 | -1.33±0.59                   | 0.22            |
| $\epsilon_a/\epsilon_s$ ratio              | 0.47±0.11                 | 0.53±0.19                  | 0.55±0.19                    | 0.19            |
| <b>RA Global</b>                           |                           |                            |                              |                 |
| maximum volume, cm <sup>3</sup>            | 61.57±20.07               | 57.04±15.66                | 52.46±16.43                  | 0.12            |
| maximal RA volume index, mL/m <sup>2</sup> | 29.97±10.26               | 28.46±8.78                 | 25.10±7.87                   | 0.09            |
| Peak dv/dt, ml/s                           | 133.34±43.84              | 116.74±43.02               | 117.65±52.02                 | 0.39            |
| $\epsilon_{sr}$ , %                        | 39.20±14.46               | 43.78±14.74                | 39.49±14.74                  | 0.50            |
| $\epsilon_{ar}$ , %                        | 15.23±7.54                | 22.16±9.35*                | 19.36±9.13*                  | 0.04            |
| SRs,s <sup>-1</sup>                        | 1.28±0.43                 | 1.24±0.51                  | 1.23±0.42                    | 0.91            |
| SRe,s <sup>-1</sup>                        | -0.94±0.39                | -0.74±0.35                 | -0.86±0.35                   | 0.21            |
| Sra,s <sup>-1</sup>                        | -1.04±0.46                | -1.29±0.49                 | -1.38±0.52**                 | 0.03            |
| $\epsilon_a/\epsilon_s$ ratio              | 0.38±0.15                 | 0.52±0.16**                | 0.52±0.15**                  | 0.00            |
| <b>RA lateral</b>                          |                           |                            |                              |                 |
| $\epsilon_{sr}$ , %                        | 52.85±22.85               | 59.69±19.89                | 55.66±25.55                  | 0.64            |
| $\epsilon_{ar}$ , %                        | 21.58±12.04               | 31.95±21.61                | 29.25±15.06                  | 0.07            |
| SRs,s <sup>-1</sup>                        | 1.67±0.71                 | 1.71±0.67                  | 1.63±0.59                    | 0.89            |
| SRe,s <sup>-1</sup>                        | -1.12±0.45                | -1.07±0.51                 | -1.09±0.44                   | 0.93            |
| Sra,s <sup>-1</sup>                        | -1.28±0.72                | -1.74±0.73*                | -1.76±0.79*                  | 0.04            |
| $\epsilon_a/\epsilon_s$ ratio              | 0.41±0.17                 | 0.54±0.22*                 | 0.54±0.13**                  | 0.03            |

\*p<0.05 versus control group; \*\*p<0.01 versus control group; & p<0.05 versus mild CAD group.  
doi:10.1371/journal.pone.0051204.t003

Numerous studies have demonstrated that strain/strain rate parameters are sensitive descriptors of regional myocardial deformation function in evaluating myocardial ischemia [9,10,28,29], and are of additional benefit to conventional myocardial functional measures [30]. However, most studies focused on LV function. The present study showed changes of

atrial strain/strain rate, even in CAD patients with normal LA size, preserved LVEF and equivocal E/E'. These findings indicated that the functional assessments of LA/RA could potentially be useful, and may emerge as an important component in assessing the hemodynamic changes in clinical practice. The  $\epsilon_a/\epsilon_s$  ratio may represent a new index of atrial contractile function

**Table 4.** Global deformation analysis of LA by the distribution pattern of obstructive coronary artery.

| Variable                          | control group<br>(n = 25) | LAD group<br>(n = 17)    | LCX/RCA group<br>(n = 10) | P Value Overall |
|-----------------------------------|---------------------------|--------------------------|---------------------------|-----------------|
| LA Global                         |                           |                          |                           |                 |
| maximum volume                    | 62.34±19.78               | 58.09±14.42              | 67.51±20.70               | 0.44            |
| Peak dv/dt                        | 151.77±50.05              | 136.53±46.67             | 170.27±49.61              | 0.23            |
| $\epsilon_{sr}$ , %               | 39.71±15.84               | 29.74±9.29 <sup>†</sup>  | 30.41±11.54               | 0.04            |
| $\epsilon_{ar}$ , %               | 17.94±9.99                | 16.87±6.91               | 12.03±3.40                | 0.16            |
| SR <sub>s</sub> , s <sup>-1</sup> | 1.29±0.38                 | 1.13±0.26                | 1.28±0.23                 | 0.28            |
| SR <sub>e</sub> , s <sup>-1</sup> | -1.06±0.32                | -0.92±0.42               | -0.95±0.46                | 0.49            |
| SR <sub>a</sub> , s <sup>-1</sup> | -1.14±0.38                | -1.45±0.46 <sup>*#</sup> | -1.10±0.41                | 0.04            |
| $\epsilon_a/\epsilon_s$ ratio     | 0.44±0.11                 | 0.57±0.12 <sup>**#</sup> | 0.44±0.20                 | 0.01            |

Abbreviations: LAD, left anterior descending coronary artery; LCX, left circumflex coronary artery; RCA, right coronary artery.

\*p<0.05 versus control group; \*\*p<0.01 versus control group; # p <0.05 versus LCX/RCA group.

doi:10.1371/journal.pone.0051204.t004

that deserves further assessment. And future study is warranted to evaluate whether these novel echocardiographic parameters can predict enlargement of LA or development of LV diastolic dysfunction or arrhythmias.

Previous studies have proven that E/E' ratio in gray zone (8 to 15) are limited in the estimation of LV filling pressures [20,31]. In this case, elevated plasma NT-proBNP level would provide incremental diagnostic evidence [32,33]. According to the non-invasive assessments, none of the patients in our study were found to have definitely elevated LV filling pressure (E/E' ratio >15, or NT-proBNP >200 pg/ml), that might minimize the effect of elevated LV filling pressure on atrial function. We observed that our patients still had significantly more decreased atrial SRe, which probably indicated impaired myocardial dysfunction of LA. Moreover, we found that SRa and  $\epsilon_a/\epsilon_s$  ratio of LA was significantly enhanced in patients with LAD stenosis. One explanation could be that hyperactive LA booster pump action compensated for the diminution of LV stroke work [34,35], whilst no similar founding was shown in patients with LCX/RCA stenosis, possibly due to atrial ischemia caused by obstructive LCX/RCA branches that supply the atrium [36,37]. However, it can still be discussed that increased SRa and  $\epsilon_a/\epsilon_s$  ratio of LA could be due to altered left ventricular compliance with shifting of left ventricular filling to late systole. It is somewhat unexpected that we did not observe a significant difference in the LA/RA deformation parameters between severe coronary stenosis and mild stenosis groups. The exact explanation was unclear. Further studies are necessary to investigate these issues and clarify the detailed mechanisms.

### Study Limitations

The quality of speckle tracking depends highly on the spatial resolution of the image and on the frame rate of the cine-loop. Without dedicated software, measuring strain and strain rate in the atrium is challenging, and can be influenced by nonatrial

physiological factors including LV compliance and mitral annular descent. However, recent work [38,39], including the present study, has shown that direct measurement of atrial deformation using speckle tracking method is feasible and reproducible, and can be used to evaluate LA function. The region of interest for VVI has no width for longitudinal strain/strain rate measurement. Therefore in this regard, VVI may be well-suited to study the deformation of atriums with smooth surface and thin wall, as compared with other speckle tracking software. Our results might add insight to the understanding of atrial mechanics, even before its enlargement. Nevertheless, our study had limited power due to the small sample, and the results couldn't be generalized to wider population. Left ventricular filling pressure was not measured directly in the catheterization laboratory. Evaluation of the coronary artery anatomy didn't include a detailed assessment of coronary artery branches that supply the atriums. And long-term clinical outcome data, such as echocardiographic follow-up, cardiovascular event rates and survival assessment were not part of the present study. Further studies are necessary to investigate these issues.

### Conclusions

CAD patients with normal LA size, preserved EF and E/E' in gray zone showed decreased SRe of LA and increased  $\epsilon_a$ , SRa and  $\epsilon_a/\epsilon_s$  ratio of RA. SRa and  $\epsilon_a/\epsilon_s$  of LA was found to increase in those with LAD stenosis. Further profound studies are warranted to confirm the present findings and define the cut-off values as well as technical standards.

### Author Contributions

Conceived and designed the experiments: PY GQH. Performed the experiments: PY BS. Analyzed the data: PY. Contributed reagents/materials/analysis tools: HMS WZ QZ YWJ HZ. Wrote the paper: PY GQH.

### References

- Bonow RO, Bacharach SL, Green MV, Kent KM, Rosing DR, et al. (1981) Impaired left ventricular diastolic filling in patients with coronary artery disease: assessment with radionuclide angiography. *Circulation* 64: 315–323.
- Lee KW, Blann AD, Lip GY (2005) Impaired tissue Doppler diastolic function in patients with coronary artery disease: relationship to endothelial damage/dysfunction and platelet activation. *Am Heart J* 150: 756–766.
- Leung DY, Boyd A, Ng AA, Chi C, Thomas L (2008) Echocardiographic evaluation of left atrial size and function: current understanding, pathophysiologic correlates, and prognostic implications. *Am Heart J* 156: 1056–1064.
- Tanaka H, Kawai H, Tatsumi K, Kataoka T, Onishi T, et al. (2007) Relationship between regional and global left ventricular systolic and diastolic

- function in patients with coronary artery disease assessed by strain rate imaging. *Circ J* 71: 517–523.
5. Yan P, Li H, Hao C, Shi H, Gu Y, et al. (2010) 2D-Speckle Tracking Echocardiography Contributes to Early Identification of Impaired Left Ventricular Myocardial Function in Patients with Chronic Kidney Disease. *Nephron Clin Pract* 118: c232–c240.
  6. Leung DY, Ng AC (2010) Emerging clinical role of strain imaging in echocardiography. *Heart Lung Circ* 19: 161–174.
  7. Kim DG, Lee KJ, Lee S, Jeong SY, Lee YS, et al. (2009) Feasibility of two-dimensional global longitudinal strain and strain rate imaging for the assessment of left atrial function: a study in subjects with a low probability of cardiovascular disease and normal exercise capacity. *Echocardiography* 26: 1179–1187.
  8. Vianna-Pinton R, Moreno CA, Baxter CM, Lee KS, Tsang TS, et al. (2009) Two-dimensional speckle-tracking echocardiography of the left atrium: feasibility and regional contraction and relaxation differences in normal subjects. *J Am Soc Echocardiogr* 22: 299–305.
  9. Perk G, Kronzon I (2009) Non-Doppler two dimensional strain imaging for evaluation of coronary artery disease. *Echocardiography* 26: 299–306.
  10. Tsai WC, Liu YW, Huang YY, Lin CC, Lee CH, et al. (2010) Diagnostic value of segmental longitudinal strain by automated function imaging in coronary artery disease without left ventricular dysfunction. *J Am Soc Echocardiogr* 23: 1183–1189.
  11. Hoit BD (2011) Strain and strain rate echocardiography and coronary artery disease. *Circ Cardiovasc Imaging* 4: 179–190.
  12. Dattilo G, Lamari A, Zito C, Carej S, Marte F, et al. (2010) 2-Dimensional Strain echocardiography and early detection of myocardial ischemia. *Int J Cardiol* 145: e6–e8.
  13. Keys A, Fidanza F, Karvonen MJ, Kimura N, Taylor HL (1972) Indices of relative weight and obesity. *J Chronic Dis* 25: 329–343.
  14. Gurbel PA, Kreutz RP, Bliden KP, DiChiara J, Tantry US (2008) Biomarker analysis by fluorokine multianalyte profiling distinguishes patients requiring intervention from patients with long-term quiescent coronary artery disease: a potential approach to identify atherosclerotic disease progression. *Am Heart J* 155: 56–61.
  15. Sun T, Huang Y, Phillips MI, Luo X, Zhu J, et al. (2010) Growth differentiation factor 15 and coronary collateral formation. *Clin Cardiol* 33: E1–E5.
  16. Lang RM, Bierig M, Devereux RB, Flachskampf FA, Foster E, et al. (2005) Recommendations for chamber quantification: a report from the American Society of Echocardiography's Guidelines and Standards Committee and the Chamber Quantification Writing Group, developed in conjunction with the European Association of Echocardiography, a branch of the European Society of Cardiology. *J Am Soc Echocardiogr* 18: 1440–1463.
  17. Nishimura RA, Miller FA Jr, Callahan MJ, Benassi RC, Seward JB, et al. (1985) Doppler echocardiography: theory, instrumentation, technique, and application. *Mayo Clin Proc* 60: 321–343.
  18. Devereux RB, Alonso DR, Lutas EM, Gottlieb GJ, Campo E, et al. (1986) Echocardiographic assessment of left ventricular hypertrophy: comparison to necropsy findings. *Am J Cardiol* 57: 450–458.
  19. Mosteller RD (1987) Simplified calculation of body-surface area. *N Engl J Med* 317: 1098.
  20. Ommen SR, Nishimura RA, Appleton CP, Miller FA, Oh JK, et al. (2000) Clinical utility of Doppler echocardiography and tissue Doppler imaging in the estimation of left ventricular filling pressures: A comparative simultaneous Doppler-catheterization study. *Circulation* 102: 1788–1794.
  21. Mitchell JH, Gilmore JP, Sarnoff SJ (1962) The transport function of the atrium. Factors influencing the relation between mean left atrial pressure and left ventricular end diastolic pressure. *Am J Cardiol* 9: 237–247.
  22. Psaty BM, Manolio TA, Kuller LH, Kronmal RA, Cushman M, et al. (1997) Incidence of and risk factors for atrial fibrillation in older adults. *Circulation* 96: 2455–2461.
  23. Russo C, Jin Z, Homma S, Rundek T, Elkind MS, et al. (2012) Left atrial minimum volume and reservoir function as correlates of left ventricular diastolic function: impact of left ventricular systolic function. *Heart* 98: 813–820.
  24. Guan Z, Zhang D, Huang R, Zhang F, Wang Q, et al. (2010) Association of left atrial myocardial function with left ventricular diastolic dysfunction in subjects with preserved systolic function: a strain rate imaging study. *Clin Cardiol* 33: 643–649.
  25. Liu YY, Xie MX, Xu JF, Wang XF, Lv Q, et al. (2011) Evaluation of left atrial function in patients with coronary artery disease by two-dimensional strain and strain rate imaging. *Echocardiography* 28: 1095–1103.
  26. Dokainish H, Nguyen JS, Sengupta R, Pillai M, Alam M, et al. (2010) Do additional echocardiographic variables increase the accuracy of E/e' for predicting left ventricular filling pressure in normal ejection fraction? An echocardiographic and invasive hemodynamic study. *J Am Soc Echocardiogr* 23: 156–161.
  27. Pirat B, Khoury DS, Hartley CJ, Tiller L, Rao L, et al. (2008) A novel feature-tracking echocardiographic method for the quantitation of regional myocardial function: validation in an animal model of ischemia-reperfusion. *J Am Coll Cardiol* 51: 651–659.
  28. Kalay N, Celik A, Inanc T, Dogan A, Ozdogru I, et al. (2011) Left Ventricular Strain and Strain Rate Echocardiography Analysis in Patients with Total and Subtotal Occlusion in the Infarct-Related Left Anterior Descending Artery. *Echocardiography* 28: 203–209.
  29. Kimura K, Takenaka K, Pan X, Ebihara A, Uno K, et al. (2011) Prediction of coronary artery stenosis using strain imaging diastolic index at rest in patients with preserved ejection fraction. *J Cardiol*.
  30. Nesbitt GC, Mankad S, Oh JK (2009) Strain imaging in echocardiography: methods and clinical applications. *Int J Cardiovasc Imaging* 25 Suppl 1: 9–22.
  31. Min PK, Ha JW, Jung JH, Choi EY, Choi D, et al. (2007) Incremental value of measuring the time difference between onset of mitral inflow and onset of early diastolic mitral annulus velocity for the evaluation of left ventricular diastolic pressures in patients with normal systolic function and an indeterminate E/E'. *Am J Cardiol* 100: 326–330.
  32. Paulus WJ (2010) Novel strategies in diastolic heart failure. *Heart* 96: 1147–1153.
  33. Stolker JM, Rich MW (2010) Clinical utility of B-type natriuretic peptide for estimating left ventricular filling pressures in unselected elderly patients undergoing diagnostic coronary angiography. *J Invasive Cardiol* 22: 107–112.
  34. Sigwart U, Grbic M, Goy JJ, Kappenberg L (1990) Left atrial function in acute transient left ventricular ischemia produced during percutaneous transluminal coronary angioplasty of the left anterior descending coronary artery. *Am J Cardiol* 65: 282–286.
  35. Stewart JT, Grbic M, Sigwart U (1992) Left atrial and left ventricular diastolic function during acute myocardial ischaemia. *Br Heart J* 68: 377–381.
  36. Amundsen BH, Helle-Valle T, Edvardsen T, Torp H, Crosby J, et al. (2006) Noninvasive myocardial strain measurement by speckle tracking echocardiography: validation against sonomicrometry and tagged magnetic resonance imaging. *J Am Coll Cardiol* 47: 789–793.
  37. Stefanadis C, Dernellis J, Tsiamis E, Toutouzas P (1999) Effects of pacing-induced and balloon coronary occlusion ischemia on left atrial function in patients with coronary artery disease. *J Am Coll Cardiol* 33: 687–696.
  38. Her AY, Kim JY, Kim YH, Choi EY, Min PK, et al. (2012) Left Atrial Strain Assessed by Speckle Tracking Imaging Is Related to New-Onset Atrial Fibrillation After Coronary Artery Bypass Grafting. *Can J Cardiol*.
  39. Motoki H, Dahiya A, Bhargava M, Wazni OM, Saliba WI, et al. (2012) Assessment of left atrial mechanics in patients with atrial fibrillation: comparison between two-dimensional speckle-based strain and velocity vector imaging. *J Am Soc Echocardiogr* 25: 428–435.
